# Supplementary material for: Green chemistry synthesis of a nanocomposite graphene hydrogel with three-dimensional nano-mesopores for photocatalytic H2 production
Source: Royal Society of Chemistry journal article supplement (doi:10.1039/c3ra22950e), 2013-01-01
Supplement: c3ra22950e.pdf [file c3ra22950e.pdf]

# Electronic Supplementary Information (ESI)

## Green chemistry synthesis of nanocomposite graphene hydrogel with three-dimensional nano-mesopores for photocatalytic H<sub>2</sub> production application†

Minmin Gao, Connor Kang Nuo Peh, Wei Li Ong, Ghim Wei Ho\*

*Department of Electrical and Computer Engineering, National University of Singapore,  
4 Engineering Drive 3, 117576*

\* Address correspondence to [elehgw@nus.edu.sg](mailto:elehgw@nus.edu.sg)

### Experimental Details

#### Synthesis of TiO<sub>2</sub> nanorods, 2D RGO TiO<sub>2</sub> and Nanocomposite hydrogel (NGH)

0.34 g of TiO<sub>2</sub> anatase powder was mixed with an amount of 10 M of aqueous NaOH. The mixture was stirred for 1 h to get a homogenous mixture before it was transferred to a Teflon-lined stainless steel autoclave and heated in an oven at 110 °C for 48 h. The precipitate was then mixed with 20ml of 1M of HCl, stirred for 24 h and finally rinsed dried to form TiO<sub>2</sub> nanorods. Then 4.2 mM of HAuCl<sub>4</sub>, 0.42 M of urea and 0.1g of TiO<sub>2</sub> nanorods were added into 10ml DI water and stirred for 2 h at 80 °C water bath. The mixture was then calcinated at 300 °C for 4 h to obtain TiO<sub>2</sub> nanorods-Au nanoparticles. Subsequently, 0.25g of VC was added into 10 ml Graphite oxide (GO) (produced by modified Hummers method<sup>1</sup>) aqueous dispersion (0.2 mg/ml) and 30 mg of TiO<sub>2</sub> nanorods/TiO<sub>2</sub> loaded Au nanoparticles and heated to 90°C for 1.5 to 4 hr to obtain NGH and NGH-Au respectively. 2D RGO TiO<sub>2</sub> is prepared based on the same procedure without the addition of Au nanoparticles and VC (which is essential for formation of 3D hydrogel).

#### Materials Characterizations

Scanning electron microscopy (SEM) characterization was carried out using a JEOL FEG JSM 6700F field-emission operating at 15kV. X-ray photoelectron spectroscopy (XPS), VG ESCALAB 220I-XL system equipped with an Mg K $\alpha$  x-ray source was employed chemical composition studies. X-ray diffraction (XRD) was carried out on a Philips X-ray diffractometer with Cu K $\alpha$  radiation ( $\lambda=1.541\text{\AA}$ ). Absorption spectra were obtained using a Shimadzu UV-3600 UV-vis spectrophotometer. Brunauer- Emmett-Teller (BET) measurements were conducted using Quantachrome Nova 1200 with N<sub>2</sub> as the adsorbate at liquid nitrogen temperature. Raman

spectra were measured using Raman spectroscopy (Renishaw inVia Raman microscope) with VIS (488 and 633 nm) and UV (325 nm) lasers. H<sub>2</sub> uptake was measured using pressure-Composition Isotherm Measurement with the AMC four-channel Gas Reaction Controller (4-ch GRC). Electrochemical impedance spectroscopy (EIS) was performed using a PARSTAT 4000 from Princeton. The electrolyte used was 0.1M Na<sub>2</sub>SO<sub>4</sub> in deionized water. H<sub>2</sub> evolution measurements were carried out using 30 mg of hydrogel and 10 ml DI water (10% methanol) contained in a quartz vial and illuminated with a 300W Xe lamp (Excelitas, PE300BFM). The reaction mixture was purged with Ar gas for 15 min prior to measurements. The reaction mixture was syringe drawn (100 μl) to sample the gas composition using gas chromatographer (Shimadzu, GC-2014AT).

### H<sub>2</sub> adsorption of NGH

Figure S1 shows pure TiO<sub>2</sub>, 2D RGO-TiO<sub>2</sub> and 3D NGH were irradiated with Xenon lamp for 2h before removing them from the lamp. This is followed by mechanically agitation in a conventional ultrasonic bath for duration of 90 min while H<sub>2</sub> that were trapped and released were intermittently measured at 30, 60 and 90 min. It is noted that the pure TiO<sub>2</sub> and 2D graphene sheets TiO<sub>2</sub> composite show lower H<sub>2</sub> content as compared to the 3D NGH. Architecturing a 3D interconnected framework (hydrogel) forms desirable pores which facilitate adsorption of H<sub>2</sub>.

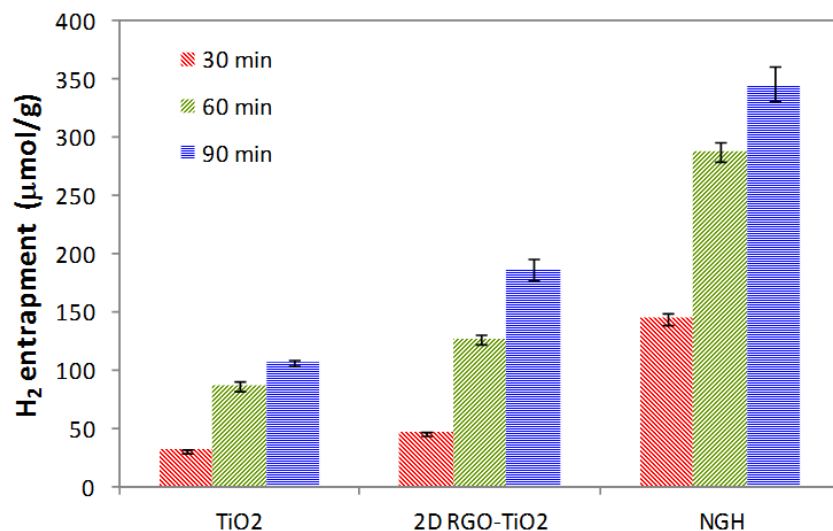

Figure S1: H<sub>2</sub> adsorption in pure TiO<sub>2</sub>, 2D RGO-TiO<sub>2</sub> and NGH.

Pressure-composition isotherm of NGH at room temperature and pressure range of 0 to 100 atm was carried out to affirm H<sub>2</sub> uptake capabilities of the NGH (figure S2). The H<sub>2</sub> adsorption of NGH was around 2.5 and 4.2 wt% at pressure of 50 and 100 atm respectively. The adsorption capacity of NGH at room temperature is comparable to GO-MWCNTS composite (2.6 wt %) while surpasses many other metal-organic frameworks (MOFs) and carbon based materials.<sup>2</sup> However, it was found that not all adsorbed H<sub>2</sub> desorbed when the samples were evacuated. The presence of hysteresis is possibly due to the trapping of adsorbed H<sub>2</sub> molecules in small cavities or mesopores such as interlayer graphene sheets (~3.8 Å). At the present stage, kinetics of H<sub>2</sub> adsorption may not be optimal but potentially tunable since it has been experimentally shown and calculated (first-principles calculations) that interlayer distance of graphene sheets plays an important role for optimal H<sub>2</sub> kinetics.<sup>3</sup> In our case, the kinetics of H<sub>2</sub> adsorption is possibly determined not only by the H<sub>2</sub> molecules diffusing through the porous network of NGH but also through the lamellar interlayer graphene sheets. In general, high micropore volume and surface area are essential parameters for consideration of H<sub>2</sub> adsorption capacity which is well-taken into account in our architected NGH as it offers a more direct diffusion pathway and greater access to internal surfaces.

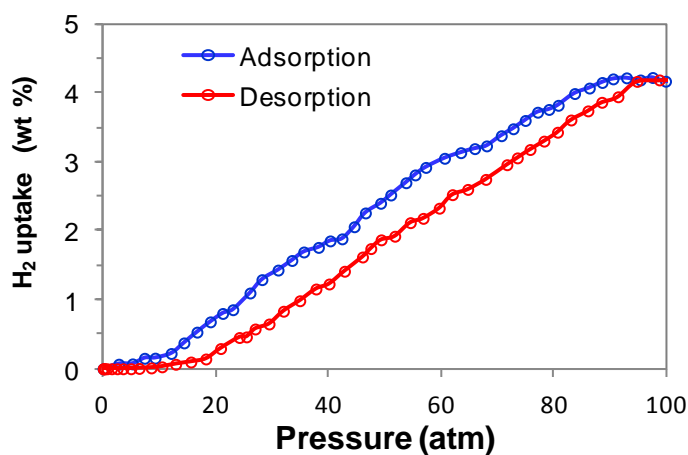

Figure S2: Pressure-composition H<sub>2</sub> isotherm of NGH at room temperature and pressure range of 0 to 100 atm.

### Sonocatalysis H<sub>2</sub> production of NGH

It can be observed that purely mechanically agitated photocatalyst show low H<sub>2</sub> production (figure S3). The use of ultrasound for photocatalytic reaction (sonocatalysis) has been reported to produce H<sub>2</sub> as it promotes catalytic activity due to surface cleaning, particle size reduction and enhanced mass transport.<sup>4</sup>

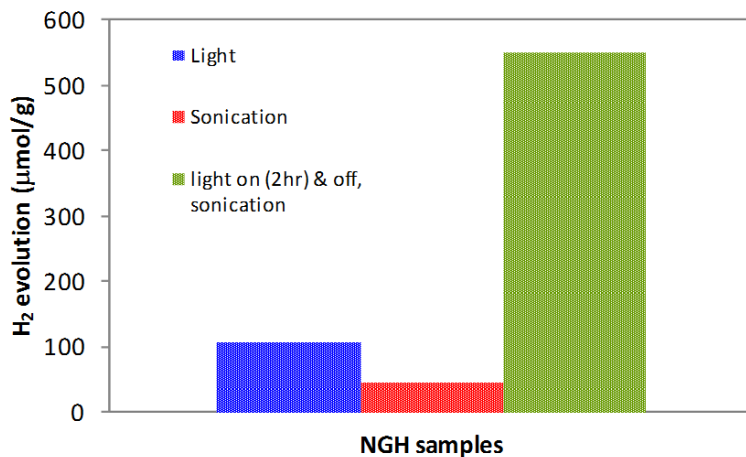

Figure S3: H<sub>2</sub> measurements after light irradiation, sonification and light irradiation (2 h) with sonification of NGH.

### References:

1. Hummers, W. S. & Offeman, R. E. Preparation of graphitic oxide. *J. Am. Chem. Soc.* 1958, **80**, 1339.
2. S. H. Aboutalebi, S. A. Yamini, I. Nevirkovets, K.; Liu, H. K. Konstantinov, *Adv. Energy Mater.* 2012, DOI: 10.1002/aenm.201200154.
3. B. H. Kim, W. G. Hong, H. Y. Yu, Y. K. Han, S. M. Lee, S. J. Chang, H. R. Moon, Y. Jun, H. J. Kim. *Phys. Chem. Chem. Phys.* 2012, **14**, 1480–1484.
4. T. J. Mason, Current Trends and Future Prospects. In: Price GJ, editor. Current trends in sonochemistry. Cambridge, London: The Royal Society of Chemistry; 1992. p. 171.
